# Supplementary material for: Anion-modulated bifunctional electrocatalytic activity of nickel telluride/cobalt telluride mesoporous nanosheets for high-efficiency and stable overall water splitting
Source: Royal Society of Chemistry journal article supplement (doi:10.1039/d5ta03463a), 2025-01-01
Supplement: d5ta03463a2.pdf [file d5ta03463a2.pdf]

**Anion-modulated bifunctional electrocatalytic activity of nickel  
telluride/cobalt telluride mesoporous nanosheets for high-efficiency and  
stable overall water splitting**

**Yagya Raj Rosyara<sup>a</sup>, Ishwor Pathak<sup>ac</sup>, Alagan Muthurasu<sup>a</sup>, Debendra Acharya<sup>a</sup>, Kisan  
Chhetri<sup>a</sup>, Taewoo Kim<sup>a</sup>, Milan Babu Poudel<sup>d</sup>, Gunendra Prasad Ojha<sup>e</sup>, Tae Hoon Ko<sup>\*a</sup>**

**<sup>b</sup> Hak Yong Kim<sup>\*a b</sup>**

*<sup>a</sup> Department of Nano Convergence Engineering, Jeonbuk National University, Jeonju 561-756, Republic of  
Korea*

*<sup>b</sup> Department of Organic Materials and Fiber Engineering, Jeonbuk National University, Jeonju 561-756,  
Republic of Korea*

*<sup>c</sup> Department of Chemistry, Amrit Campus, Tribhuvan University, Kathmandu 44613, Nepal*

*<sup>d</sup> Department of Convergence Technology Engineering, Jeonbuk National University 567 Baekje-daero,  
Deokjin-gu, Jeonju-si, Jeollabuk-do 54896, Republic of Korea*

*<sup>e</sup> Department of Chemistry and Physics, Prairie View A&M University, Prairie View, TX 77446, USA*

*Corresponding Author's Email: [khy@jbnu.ac.kr](mailto:khy@jbnu.ac.kr), [kth1745@jbnu.ac.kr](mailto:kth1745@jbnu.ac.kr)*

**Materials:**

Cobalt Nitrate hexahydrate ( $\text{Co}(\text{NO}_3)_2 \cdot 6\text{H}_2\text{O}$ ), Sigma-Aldrich), Nickel Nitrate hexahydrate ( $\text{Ni}(\text{NO}_3)_2 \cdot 6\text{H}_2\text{O}$ ), Sigma Aldrich), 2-Methylimidazole ( $\text{C}_4\text{H}_6\text{N}_2$ ), Sodium tellurite ( $\text{Na}_2\text{TeO}_3$ , Sigma-Aldrich) were used without further purification. Methanol (99.8%), Ethanol (99.5%), and nitric acid ( $\text{HNO}_3$ , 60.0 %) were obtained from Samchum Co.Ltd., Seoul Korea. Deionized (DI) water purified through a Millipore-Q system was used to form aqueous solutions during the experiment.

**Electrochemically active surface area (ECSA):**

The ECSA was calculated from the electrochemical double layer capacitance (Cdl) of the electrode via CV scan conducted in a non-Faradic region at different scan rates from 10 to 100 mV s<sup>-1</sup> for OER. The Cdl was obtained from the slope of the curve of scan rate (mV s<sup>-1</sup>) versus current density (mA). The specific capacitance (Cdl) was calculated as :

$$C_{dl} = \frac{|j_a - j_c|}{2\nu}$$

Where  $\nu$  is the scan rate for testing CV,  $j_a$  and  $j_c$  are the anodic and cathodic current densities.

$$ECSA = \frac{\text{Specific capacitance (Cdl)}}{C_s}$$

Where,  $C_s$  is the specific capacitance (0.04 mF cm<sup>-2</sup>) in 1 M KOH electrolyte.

**The roughness factor (RF) values were calculated as:**

$$RF = \frac{ECSA}{S_{geo}}$$

$S_{geo}$  is the geometric area of the electrode that is 1 cm<sup>2</sup>

**Electrochemical Impedance spectroscopy (EIS) measurements:**

Electrochemical impedance spectroscopy (EIS) was carried out in 1.0 M KOH electrolyte to investigate the reaction kinetics. The measurements were conducted at frequency ranging from 0.01 Hz to 100 kHz. The resulting impedance spectra were analyzed by fitting to an equivalent circuit model. The model includes a series resistance ( $R_s$ ), which accounts for the ionic resistance of the electrolyte between working and reference electrodes. In parallel, the model features a charge transfer resistance ( $R_{ct}$ ), reflecting the barrier to electron transfer at the electrode-electrolyte interface, and a capacitance ( $C$ ), which mimics the double-layer capacitance arising from charge separation at the interface. Together, these elements provide valuable information on the interfacial charge transfer processes and surface

properties of the catalyst during HER and OER.

### Calculation of Faradic efficiency ( $\eta_F$ ):

The Faradic efficiency of the alkaline electrolyzer using P-doped NiTe<sub>2</sub>/CoTe<sub>2</sub> as both anode and cathode was assessed by measuring the volume of evolved O<sub>2</sub> H<sub>2</sub> gas in a lab made H-Cell. The H-cell electrolyzer operated at a current density of 10 mA cm<sup>-2</sup> for up to 120 minutes. The theoretical volumes of evolved H<sub>2</sub> and O<sub>2</sub> gases were estimated using Faraday's law:

$$V_{\text{Theoretical}} = \frac{IRTt}{PzF}$$

$T_{\text{Theoretical}}$  = Theoretical volume of gas evolution

$I$  = operating current density (mA cm<sup>-2</sup>)

$R$  = universal gas constant (0.0821 atm. L mol<sup>-1</sup> K<sup>-1</sup>)

$t$  = operating time in second (s)

$T$  = temperature on the kelvin scale (K)

$p$  = pressure (atm)

$z$  = number of electrons involved in the production of 1 mole of O<sub>2</sub> ( $z=4$ ) or H<sub>2</sub> ( $z=2$ )

$F$  = Faraday's constant ( $F= 96485$  C)

$nF$  can be determined from the following equation: the ratio of the exact volume of real gas ( $V_{\text{experimental}}$ ) to the theoretical volume ( $V_{\text{theoretical}}$ ) during the reaction.

$$nF = \frac{V_{\text{experimental}}}{V_{\text{theoretical}}}$$

where  $V_{\text{Experimental}}$  is the volume of O<sub>2</sub> and H<sub>2</sub> gas evolved under a pressure of 1 atm at 300 K upon applying a current density of 10 mA Cm<sup>-2</sup>.

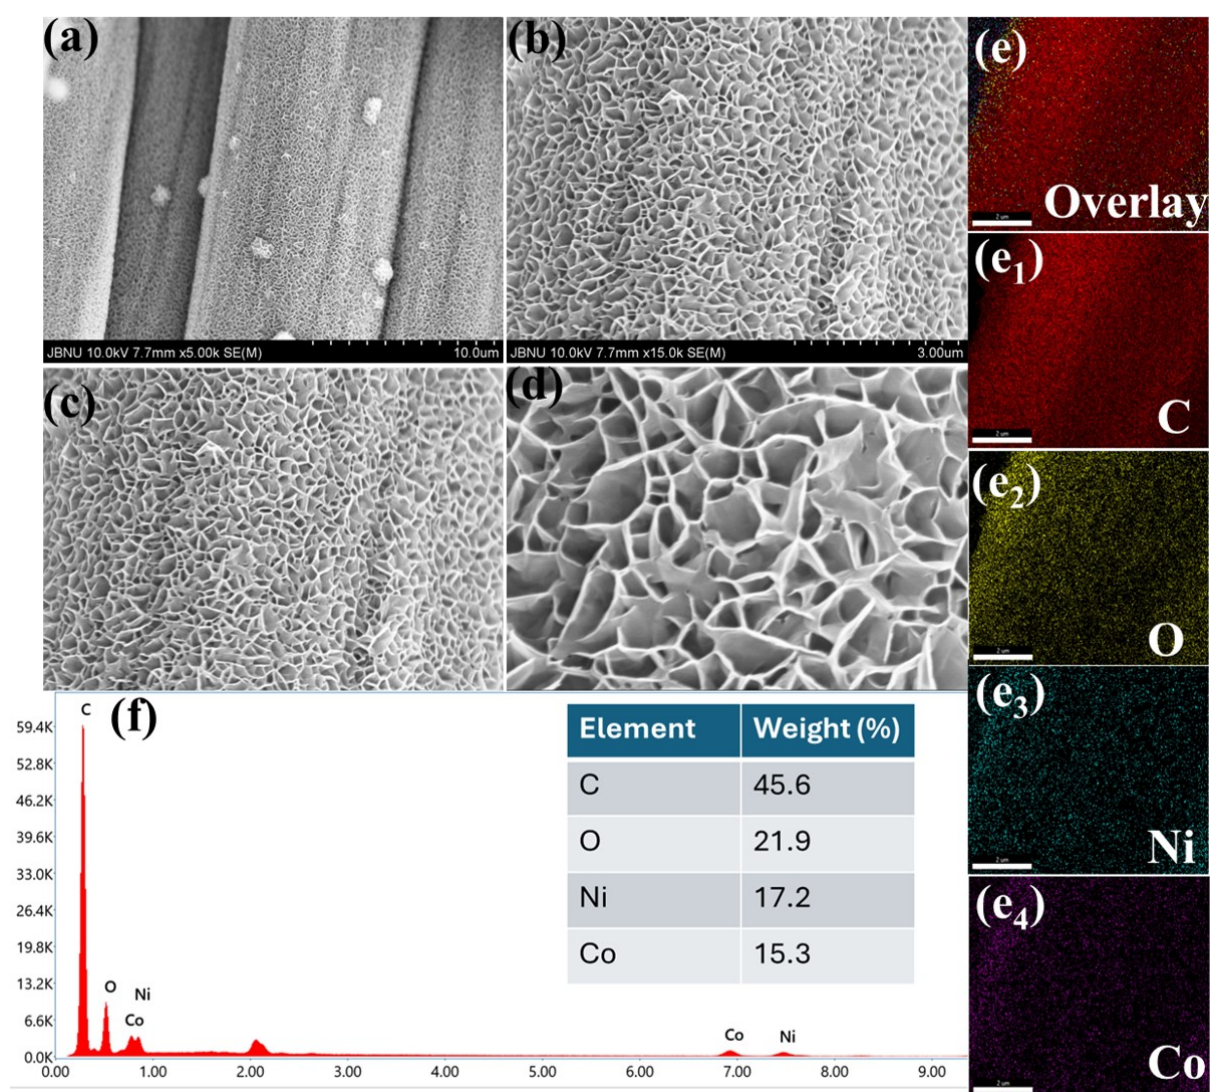

**Figure S1.** Low and high resolution FESEM image, EDX spectrum and corresponding elemental mapping of NiCo-LDH

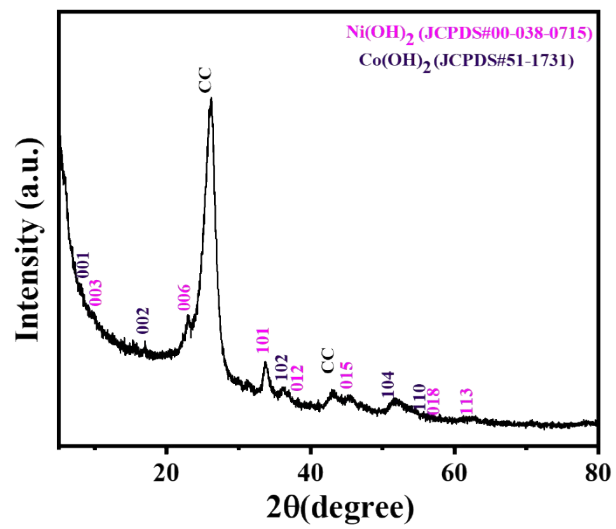

**Figure S2.** XRD pattern of NiCo-LDH@CC

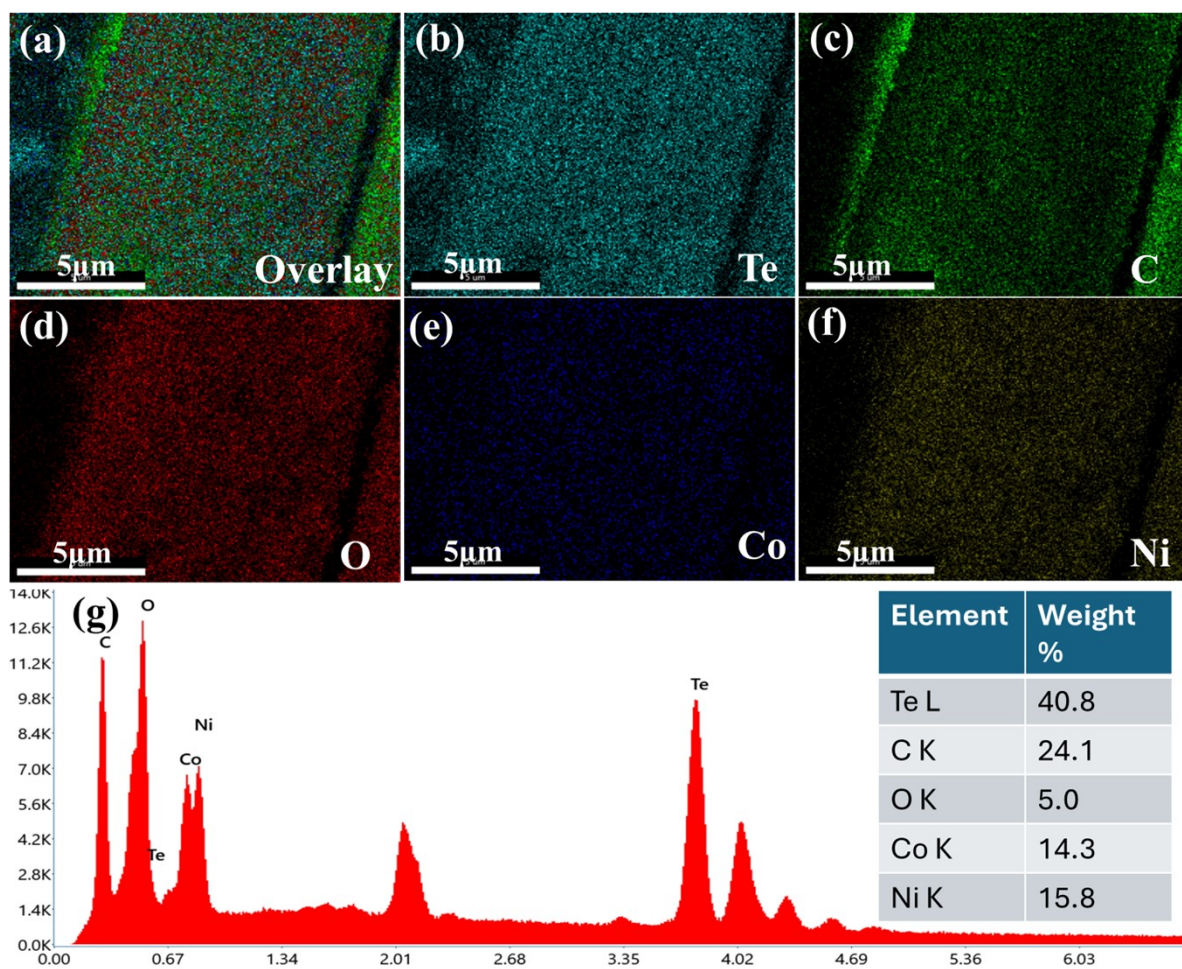

**Figure S3.** FESEM EDX spectra and corresponding elemental mapping of

$\text{NiTe}_2/\text{COTe}_2@\text{CC}$

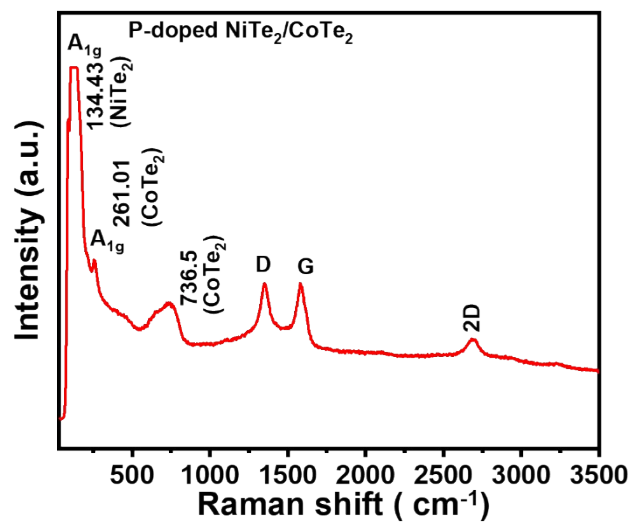

**Figure S4.** Raman Spectra of P-doped  $\text{NiTe}_2/\text{CoTe}_2@CC$  before stability



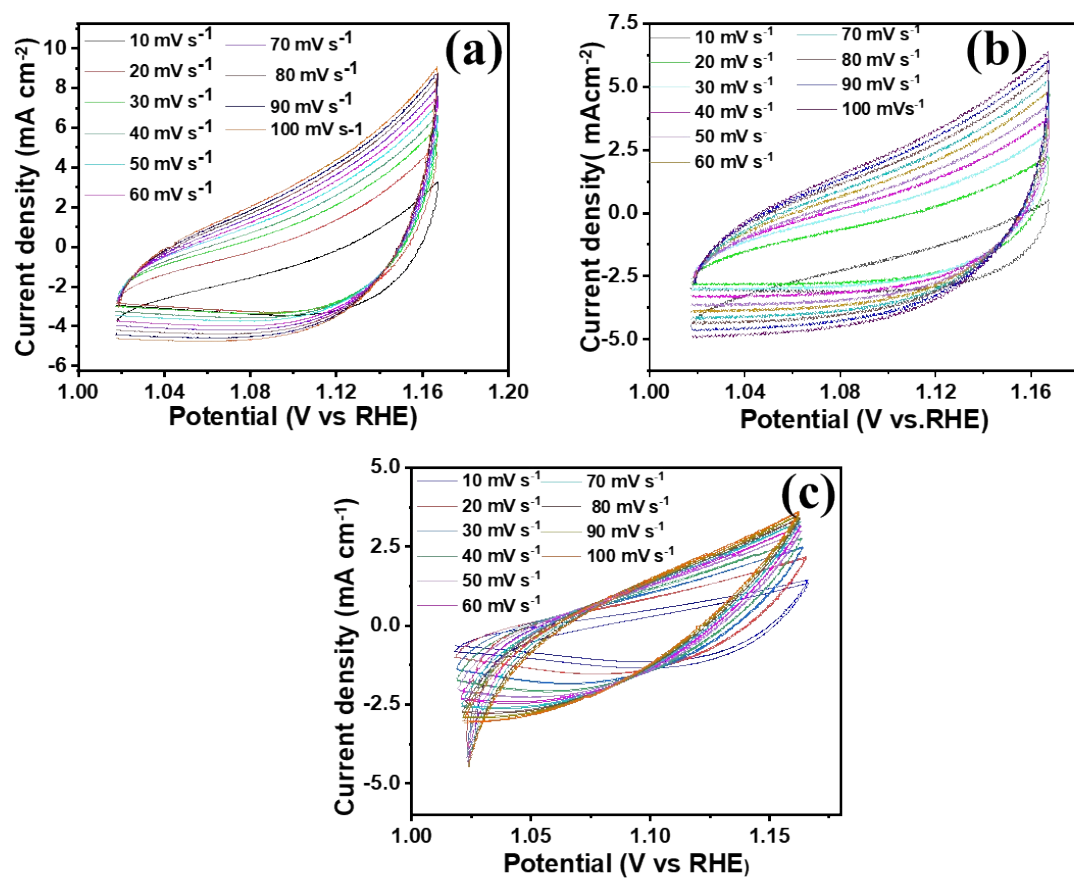

**Figure S5.** charging capacitance current of (a) P-doped NiTe<sub>2</sub>/CoTe<sub>2</sub>@CC, (b) NiTe<sub>2</sub>/CoTe<sub>2</sub>@CC, (c) NiCo-LDH



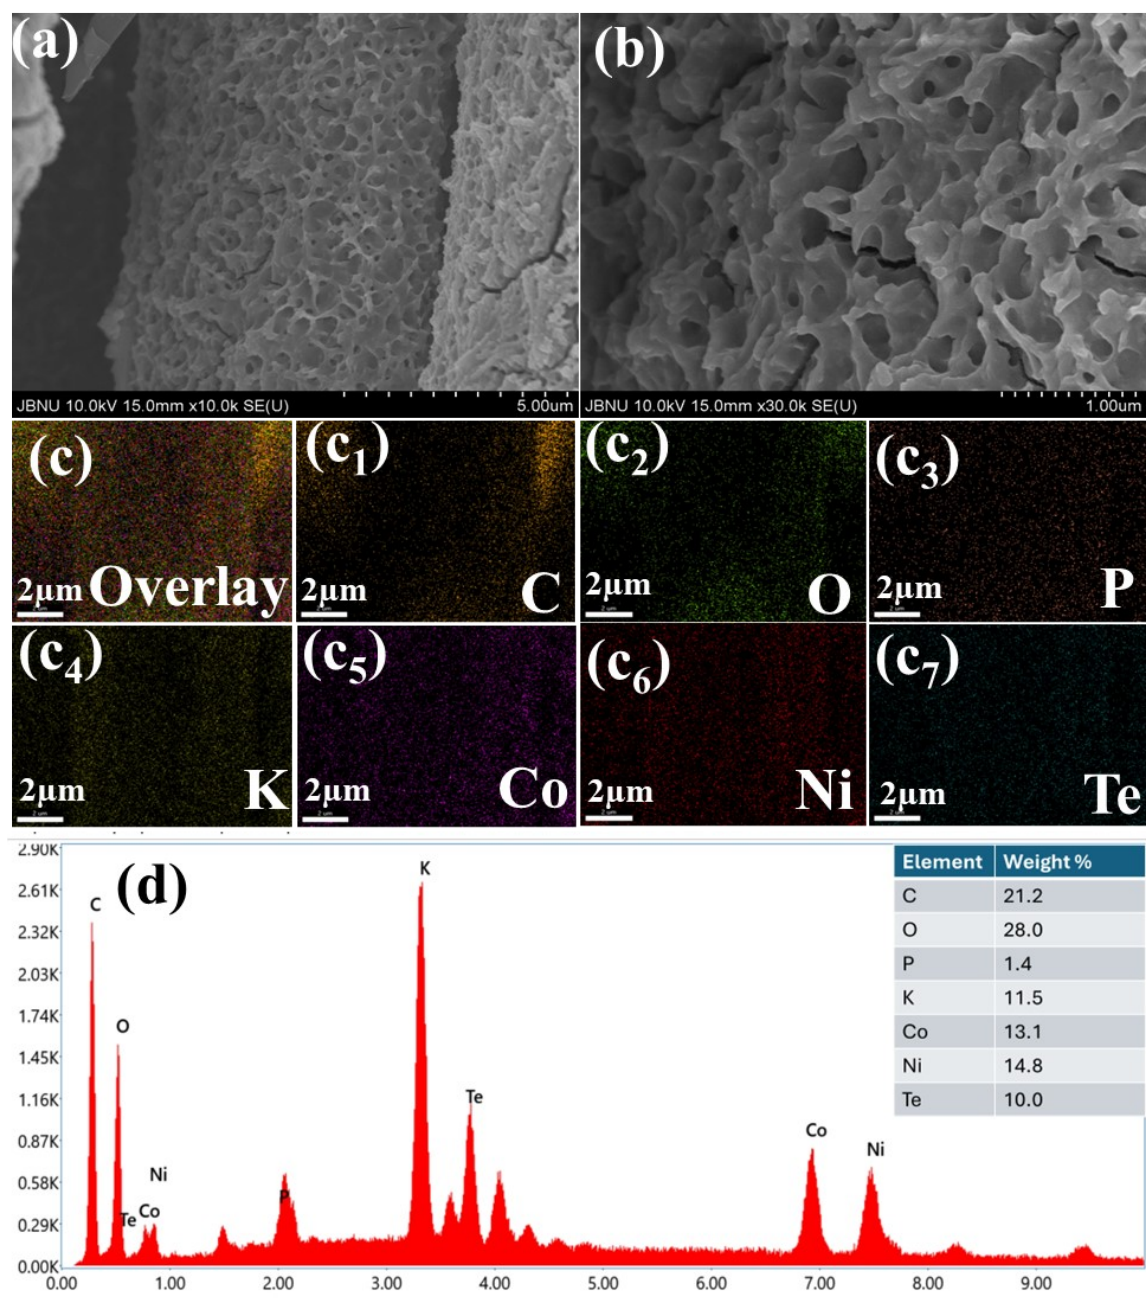

**Figure S6.** FESEM image, EDX, and corresponding elemental mapping of P-doped  $\text{NiTe}_2/\text{CoTe}_2@\text{CC}$  after OER stability test.

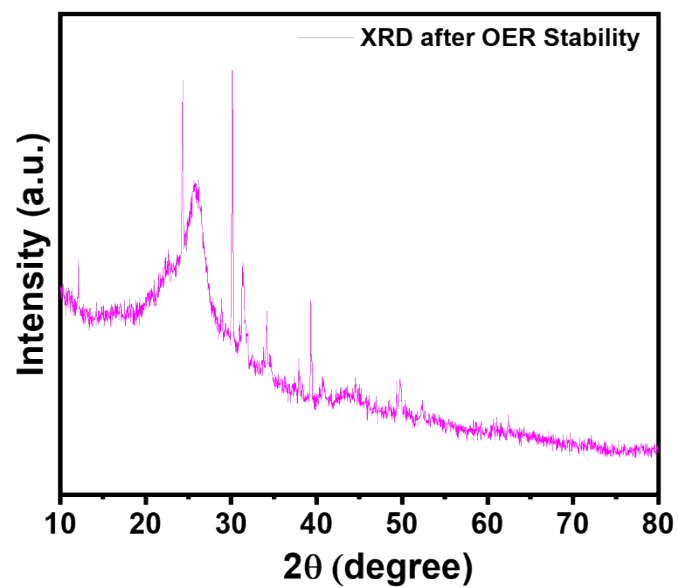

**Figure S7.** XRD pattern of P-doped Nite<sub>2</sub>/CoTe<sub>2</sub>@CC after OER stability test.

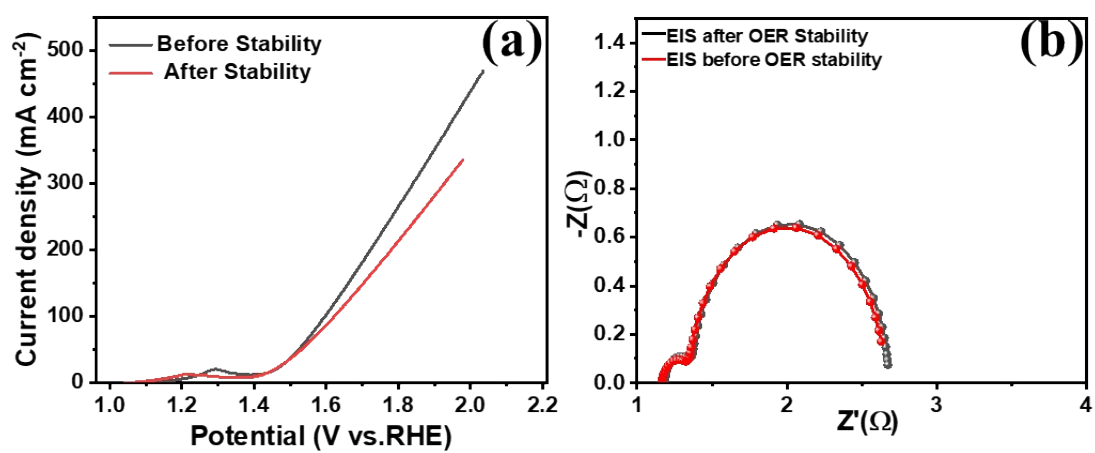

**Figure S8.** Comparison of (a) LVS and (b) EIS spectra before and after OER stability test.

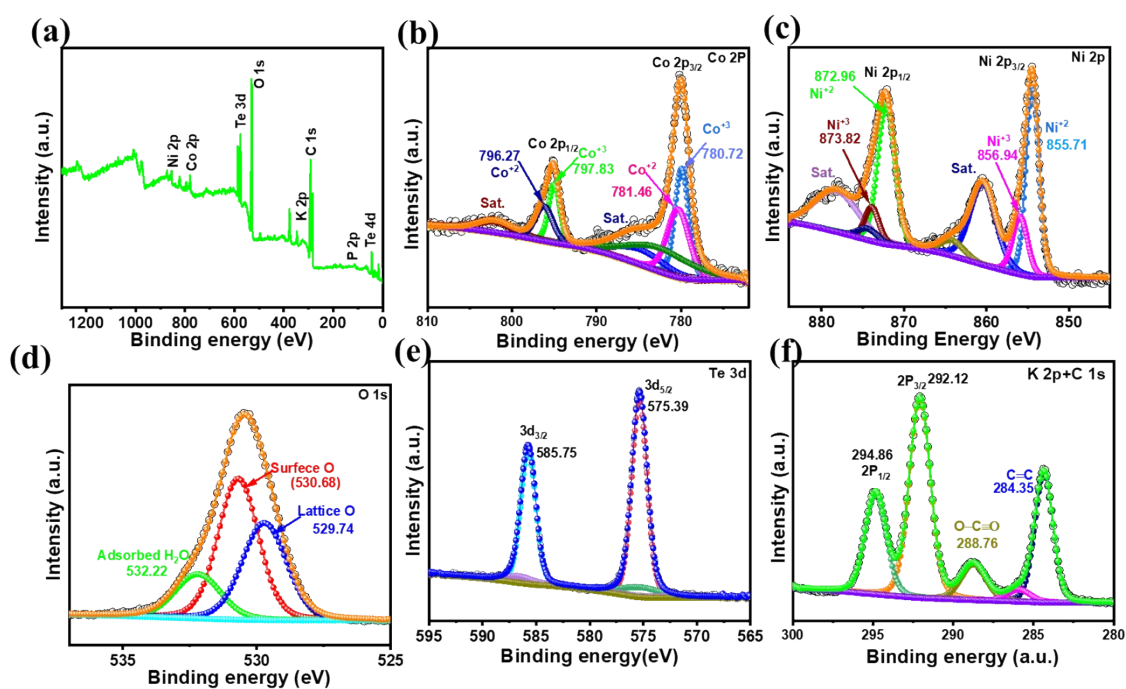

**Figure S9.** XPS survey Spectra (a), high resolution XPS spectra of (b) Co 2p, (c) Ni 2p, (d) O 1s, (e) Te 3d, (f) K2P+C 1s after OER stability test.

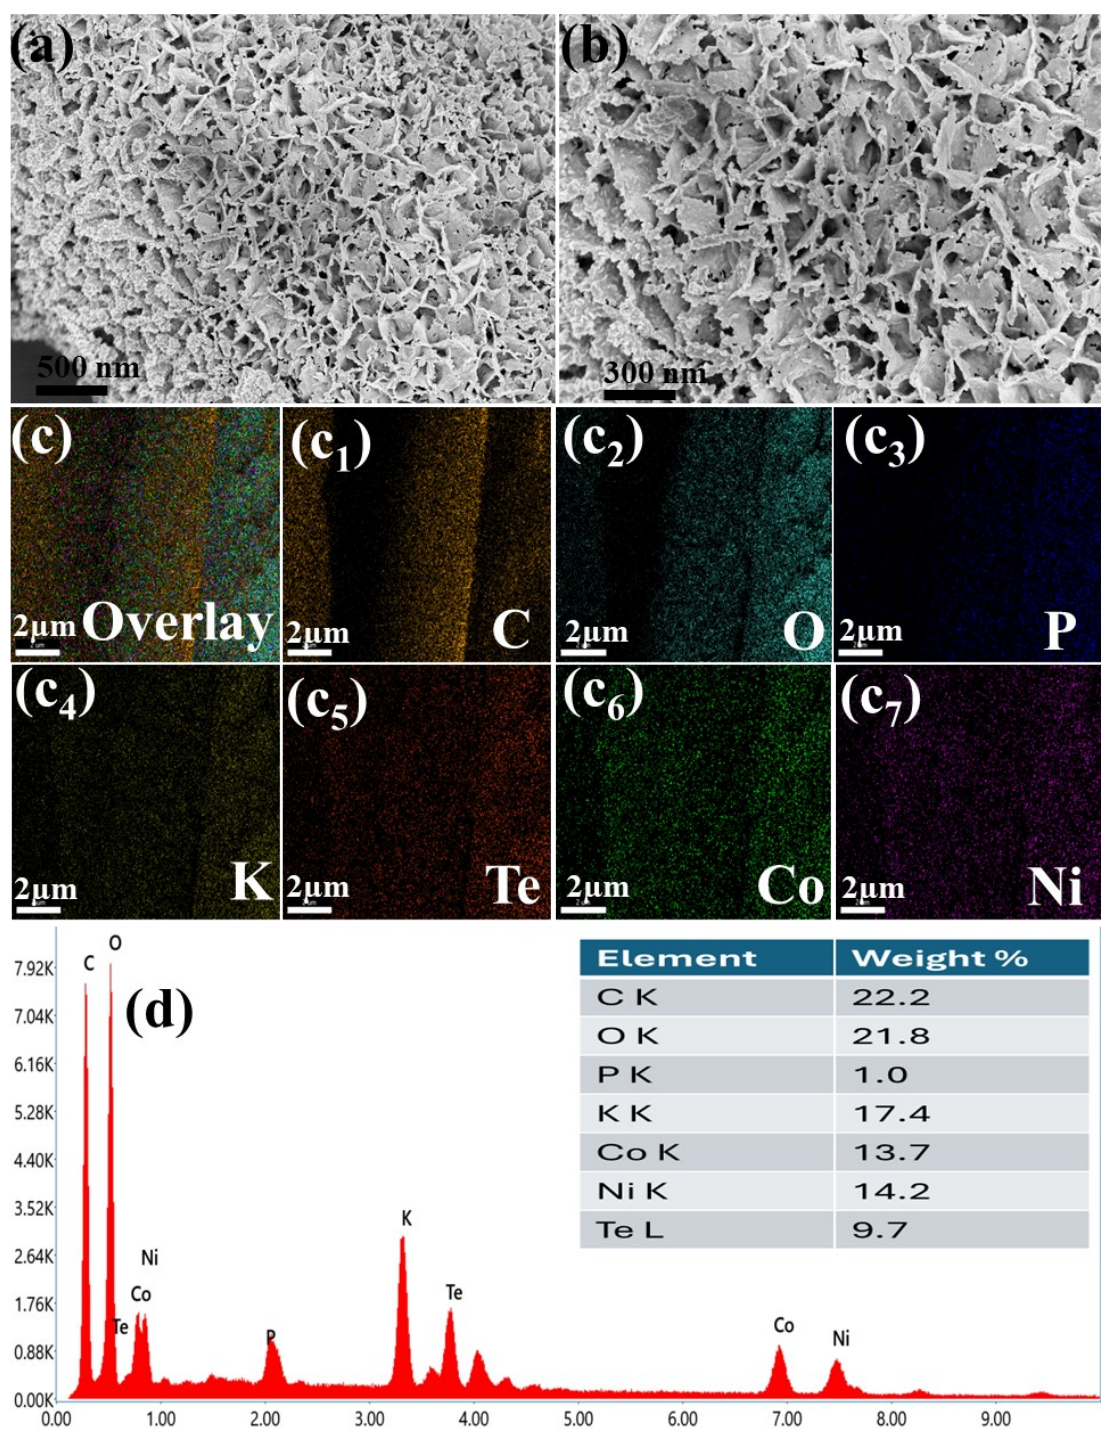

**Figure S10.** FESEM image, EDX, and corresponding elemental mapping of P-doped  $\text{NiTe}_2/\text{CoTe}_2@\text{CC}$  after HER stability test.

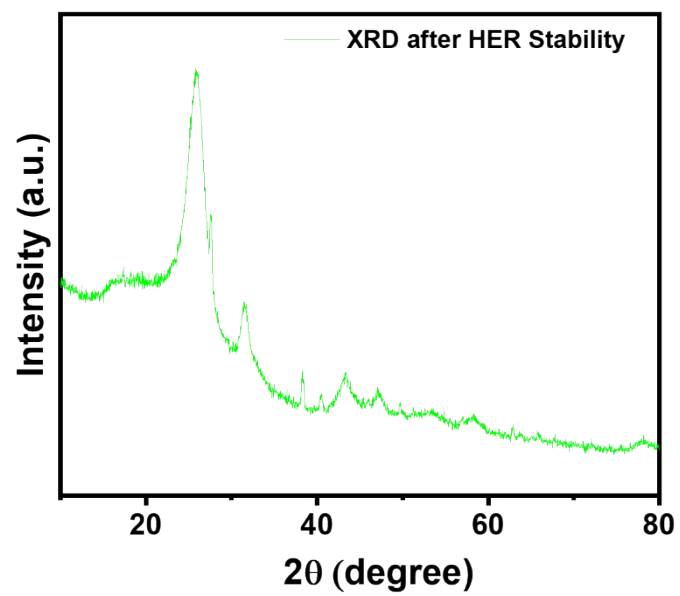

**Figure S11.** XRD patterns of P-doped NiTe<sub>2</sub>/CoTe<sub>2</sub>@CC after HER stability test



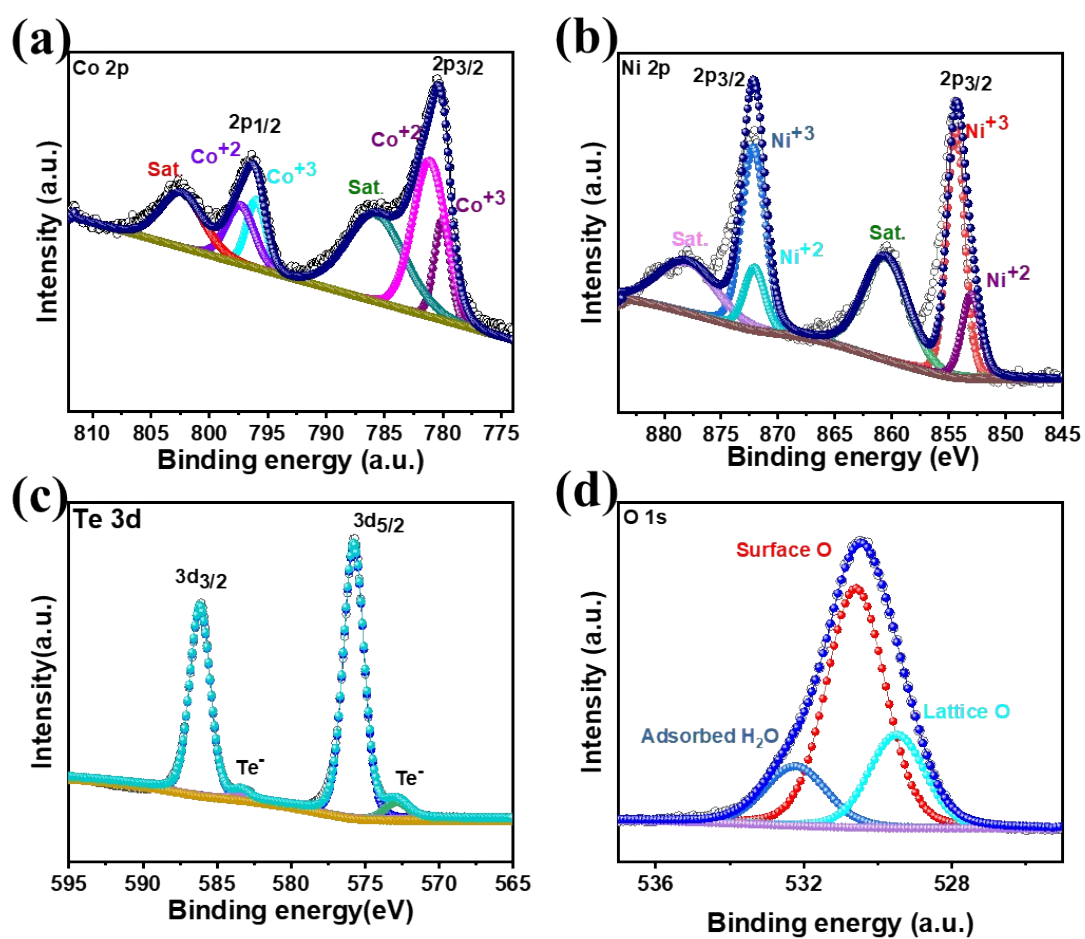

**Figure S12.** High resolution XPS spectra of (a) Co 2p, (b) Ni2p, (c) Te 3d, (d) O 1s after HER stability test



**Table S1.** Comparison of OER performance with recently reported electrocatalysts.

| S.N. | Electrocatalysts                                     | Substrate | electrolyte     | Overpotential(mV)                | Tafel slope<br>(mV dec <sup>-1</sup> ) | Ref.                 |
|------|------------------------------------------------------|-----------|-----------------|----------------------------------|----------------------------------------|----------------------|
| 1    | H-CoTe <sub>2</sub> /NiTe <sub>2</sub>               | GC        | 1.0M KOH        | 320@10mA cm <sup>-2</sup>        | 64.8                                   | <sup>1</sup>         |
| 2    | N- Fe <sub>2</sub> O <sub>3</sub> /NiTe <sub>2</sub> | Ni foam   | 1.0M KOH        | 253@10mA cm <sup>-2</sup>        | 57.7                                   | <sup>2</sup>         |
| 3    | CoTe/Co <sub>3</sub> O <sub>4</sub>                  | GC        | 1.0M KOH        | 287 @10mA cm <sup>-2</sup>       | 69                                     | <sup>3</sup>         |
| 4    | CoTe/MnO <sub>2</sub> /BN                            | CP        | 1.0M KOH        | 273@10mA cm <sup>-2</sup>        | 81                                     | <sup>4</sup>         |
| 5    | Co@0.2gNiCoTe <sub>2</sub> -<br>240                  | Co foam   | 1.0M KOH        | 280@10mA cm <sup>-2</sup>        | 34                                     | <sup>5</sup>         |
| 6    | S <sub>15</sub> -CoTe                                | NF        | 1.0M KOH        | 255@10mA cm <sup>-2</sup>        | 54.7                                   | <sup>6</sup>         |
| 7    | CoTe <sub>2</sub> @N-GC                              | CP        | 1.0M KOH        | 300@10mA cm <sup>-2</sup>        | 90                                     | <sup>7</sup>         |
| 9    | Fe-NiTe <sub>2</sub> /Ni <sub>2</sub> P              | NF        | 1.0M KOH        | 190@10mA cm <sup>-2</sup>        | 102                                    | <sup>8</sup>         |
| 10   | Fe-NiTe/NiTe <sub>2</sub>                            | GC        | 1.0M KOH        | 284@10mA cm <sup>-2</sup>        | 49                                     | <sup>9</sup>         |
| 11   | <b>P-doped NiTe<sub>2</sub>/CoTe<sub>2</sub></b>     | <b>CC</b> | <b>1.0M KOH</b> | <b>251@ 50mA cm<sup>-2</sup></b> | <b>46</b>                              | <b>This<br/>work</b> |

**Table S2.** Comparison of HER performance with recently reported electrocatalysts

| S.N.      | Electrocatalysts                                     | Substrate | electrolyte      | Overpotential(mV)<br>@10 mA cm <sup>-2</sup> | Tafel slope<br>(mV dec <sup>-1</sup> ) | Ref.                 |
|-----------|------------------------------------------------------|-----------|------------------|----------------------------------------------|----------------------------------------|----------------------|
| 1         | NiCoSe <sub>x</sub>                                  | NF        | 1.0M KOH         | 83                                           | 127                                    | <sup>10</sup>        |
| 2         | NiTe-Ni(OH) <sub>2</sub>                             | NF        | 1.0 M KOH        | 129                                          | 31.5                                   | <sup>11</sup>        |
| 3         | N- Fe <sub>2</sub> O <sub>3</sub> /NiTe <sub>2</sub> | NF        | 1.0 M KOH        | 70                                           | 47                                     | <sup>2</sup>         |
| 4         | CoTe/CoNiSe <sub>2</sub>                             | NF        | 1.0 M KOH        | 140                                          | 78                                     | <sup>12</sup>        |
| 5         | CoP-CoTe <sub>2</sub> NWs                            | CP        | 1.0 M NaOH       | 178                                          |                                        | <sup>13</sup>        |
| 6         | CoTe <sub>2</sub> -WTe <sub>2</sub>                  | NF        | 1.0 M KOH        | 178                                          | 96                                     | <sup>14</sup>        |
| 7         | NiCo-MOFs                                            | NF        | 1.0 M KOH        | 125                                          | 78                                     | <sup>15</sup>        |
| 8         | Fe-CoSe <sub>2</sub>                                 | GC        | 0.5 M KOH        | 157                                          | 112                                    | <sup>16</sup>        |
| 9         | CoTe <sub>2</sub> /CoP                               | Ti mesh   | 1.0 M KOH        | 80                                           | 57                                     | <sup>17</sup>        |
| <b>10</b> | <b>P-doped<br/>NiTe<sub>2</sub>/CoTe<sub>2</sub></b> | <b>CC</b> | <b>1.0 M KOH</b> | <b>83.53</b>                                 | <b>68</b>                              | <b>This<br/>work</b> |

**Table 3.** Comparison of overall water-splitting performance with recently reported electrocatalysts.

| S.N. | Electrocatalysts                                     | Substrate           | Electrolyte      | Cell Voltage (V)<br>@10 mA cm <sup>-2</sup> | Ref.             |
|------|------------------------------------------------------|---------------------|------------------|---------------------------------------------|------------------|
| 1    | N- Fe <sub>2</sub> O <sub>3</sub> /NiTe <sub>2</sub> | Ni Foam             | 1.0 M KOH        | 1.54                                        | 3                |
| 2    | CoP Nanoframes                                       | Ni foam             | 1.0 M KOH        | 1.65                                        | 18               |
| 3    | CoNi/CoFe <sub>2</sub> O <sub>4</sub>                | Ni foam             | 1.0 M KOH        | 1.57                                        | 19               |
| 4    | NiSe-NiSe <sub>2</sub>                               | Ni foam             | 1.0 M KOH        | 1.6                                         | 20               |
| 5    | P-doped NiSe <sub>2</sub>                            | Ni foam             | 1.0 M KOH        | 1.62                                        | 21               |
| 6    | Cr-NiSe <sub>2</sub> -N                              | Ni foam             | 1.0 M KOH        | 1.59                                        | 22               |
| 7    | CoTe                                                 | Ni foam             | 1.0 M KOH        | 1.71                                        | 23               |
| 8    | CoTe <sub>2</sub> -WTe <sub>2</sub>                  | Ni foam             | 1.0 M KOH        | 1.52                                        | 14               |
| 9    | 1T-Co-WS <sub>2</sub> /NiTe <sub>2</sub>             | Ni foam             | 1.0 M KOH        | 1.52                                        | 24               |
| 10   | <b>P-doped NiTe<sub>2</sub>/CoTe<sub>2</sub></b>     | <b>Carbon Cloth</b> | <b>1.0 M KOH</b> | <b>1.59</b>                                 | <b>This work</b> |

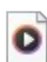

Water splitting  
video\_H cell.mp4

**Video S1:** Real time observation of gas bubble evolution during HER and OER in an H-Cell using P-doped NiTe<sub>2</sub>/CoTe<sub>2</sub> (+, -) as both anode and cathode.

## References:

1. Liu, M.; Li, Q.; Xiao, X.; Ma, X.; Xu, X.; Yin, Y.; Zhang, B.; Ding, M.; Zou, J.; Jiang, B., CoTe<sub>2</sub>/NiTe<sub>2</sub> heterojunction embedded in N-doped hollow carbon nanoboxes as high-efficient ORR/OER catalyst for rechargeable zinc-air battery. *Chemical Engineering Journal* **2024**, *486*, 150256.
2. Li, W.; Deng, Y.; Luo, L.; Du, Y.; Cheng, X.; Wu, Q., Nitrogen-doped Fe<sub>2</sub>O<sub>3</sub>/NiTe<sub>2</sub> as an excellent bifunctional electrocatalyst for overall water splitting. *Journal of Colloid and Interface Science* **2023**, *639*, 416-423.
3. Rani, P.; Ahmed, I.; Dastider, S. G.; Biswas, R.; Mondal, K.; Haldar, K. K.; Patole, S. P.; Alegaonkar, P. S., Exploring the Role of CoTe/Co<sub>3</sub>O<sub>4</sub> Composite Catalyst for Enhanced Oxygen Evolution Reaction. *ACS Applied Engineering Materials* **2023**, *1* (12), 3389-3402.
4. Rani, P.; Biswas, R.; Dutta, A.; Alegaonkar, P. S., Hierarchical CoTe/MnO<sub>2</sub>/BN Ternary Composite Exhibiting Energy-Efficient O<sub>2</sub> Evolution in Water. *Energy & Fuels* **2024**, *38* (17), 16809-16819.
5. Qi, Y.; Yang, Z.; Peng, S.; Wang, M.; Bai, J.; Li, H.; Xiong, D., Self-supported cobalt-nickel bimetallic telluride as an advanced catalyst for the oxygen evolution reaction. *Inorganic Chemistry Frontiers* **2021**, *8* (18), 4247-4256.
6. Pi, Z.; Hao, J.; Kuang, S.; Shi, R.; Li, X.; Wang, J.; Lin, H.; Nie, M.; Li, Q., In-situ route to sulfur-doped cobalt telluride nanowires for efficient oxygen evolution in alkaline. *International Journal of Hydrogen Energy* **2024**, *93*, 84-91.
7. Liu, M.; Lu, X.; Guo, C.; Wang, Z.; Li, Y.; Lin, Y.; Zhou, Y.; Wang, S.; Zhang, J., Architecting a Mesoporous N-Doped Graphitic Carbon Framework Encapsulating CoTe<sub>2</sub> as an Efficient Oxygen Evolution Electrocatalyst. *ACS Applied Materials & Interfaces* **2017**, *9* (41), 36146-36153.
8. Li, W.; Yu, X.; Luo, L.; Du, Y.; Wu, Q., Fe-doped NiTe<sub>2</sub>/Ni<sub>2</sub>P grown in situ on Ni foam as an efficient electrocatalyst for oxygen evolution reaction. *Journal of Alloys and Compounds* **2022**, *917*, 165369.
9. Zhang, Y.; Wang, B.; Bi, K.; Tian, F.; Wang, C., Self-assembly of 2D Fe-doped NiTe/NiTe<sub>2</sub> heterostructure for boosted oxygen evolution. *Molecular Catalysis* **2023**, *550*, 113586.
10. Lin, X.; Zhong, H.; Hu, W.; Du, J., Nickel-Cobalt Selenide Electrocatalytic Electrode toward Glucose Oxidation Coupling with Alkaline Hydrogen Production.

*Inorganic Chemistry* **2023**, 62 (26), 10513-10521.

11. Li, Q.; Huang, N.; Zhu, W.; Ma, H.; Du, J.; He, X.; Wang, S.; Li, C.; Wang, W.; Weng, Y., Preparation of NiTe-Ni(OH)<sub>2</sub>/NF active cathode material as an electrocatalyst for hydrogen evolution. *Journal of Alloys and Compounds* **2024**, 990, 174458.
12. Atallah, D.; Ali Shah, T.; Rodríguez-Ortiz, G.; Nauman Ullah, M.; Mahmood, F.; Shazly, G. A.; Waqas, M., CoTe Tailored CoNiSe<sub>2</sub> Nanostructures as CoTe/CoNiSe<sub>2</sub> Hybrids Facilitating Bifunctional Behavior in Overall Water Splitting. *ACS Applied Energy Materials* **2024**, 7 (22), 10693-10700.
13. Amorim, I.; Xu, J.; Zhang, N.; Yu, Z.; Araújo, A.; Bento, F.; Liu, L., Dual-phase CoP–CoTe<sub>2</sub> nanowires as an efficient bifunctional electrocatalyst for bipolar membrane-assisted acid-alkaline water splitting. *Chemical Engineering Journal* **2021**, 420, 130454.
14. Velpandian, M.; Ragunathan, A.; Ummethala, G.; Krishna Malladi, S. R.; Meduri, P., Low-Potential Overall Water Splitting Induced by Engineered CoTe<sub>2</sub>–WTe<sub>2</sub> Heterointerfaces. *ACS Applied Energy Materials* **2023**, 6 (11), 5968-5978.
15. Sreekanth, T. V. M.; Kiran, G. K.; Kim, J.; Yoo, K., NiCo bimetallic metal-organic framework (NiCo-MOFs) with distinct morphologies for efficient HER activity. *Inorganic Chemistry Communications* **2024**, 161, 112128.
16. Samal, R.; Mane, P.; Chakraborty, B.; Late, D.; Rout, C. S., Trends of earth-abundant transition metal-doped in CoSe microstructures towards improved water splitting and supercapacitor applications. *International Journal of Energy Research* **2022**, 46 (15), 24588-24601.
17. Yang, L.; Cao, X.; Wang, X.; Wang, Q.; Jiao, L., Regulative electronic redistribution of CoTe<sub>2</sub>/CoP heterointerfaces for accelerating water splitting. *Applied Catalysis B: Environmental* **2023**, 329, 122551.
18. Ji, L.; Wang, J.; Teng, X.; Meyer, T. J.; Chen, Z., CoP Nanoframes as Bifunctional Electrocatalysts for Efficient Overall Water Splitting. *ACS Catalysis* **2020**, 10 (1), 412-419.
19. Li, S.; Sirisomboonchai, S.; Yoshida, A.; An, X.; Hao, X.; Abudula, A.; Guan, G., Bifunctional CoNi/CoFe<sub>2</sub>O<sub>4</sub> /Ni foam electrodes for efficient overall water splitting at a high current density. *Journal of Materials Chemistry A* **2018**, 6 (39), 19221-19230.
20. Fan, J.; Shen, L.; Zhao, C.; Wang, Z.; Tu, Z.; Hu, J.; Yan, C., Dual-phase NiSe–NiSe<sub>2</sub> constructs rapid hydrogen evolution channels by phase control achieve high-performance water electrolysis catalyst. *International Journal of Hydrogen Energy* **2025**,

119, 397-405.

21. Lin, J.; Wang, H.; Cao, J.; He, F.; Feng, J.; Qi, J., Engineering Se vacancies to promote the intrinsic activities of P doped NiSe<sub>2</sub> nanosheets for overall water splitting. *Journal of Colloid and Interface Science* **2020**, *571*, 260-266.
22. Zheng, X.; Sun, S.; Liu, Y.; Li, D.; Tian, D.; Zhu, J.; Jiang, D., Synergistic modulation of NiSe<sub>2</sub> by doping with chromium and nitrogen for high-efficiency overall water splitting. *Applied Surface Science* **2023**, *609*, 155406.
23. Nath, M.; De Silva, U.; Singh, H.; Perkins, M.; Liyanage, W. P. R.; Umapathi, S.; Chakravarty, S.; Masud, J., Cobalt Telluride: A Highly Efficient Trifunctional Electrocatalyst for Water Splitting and Oxygen Reduction. *ACS Applied Energy Materials* **2021**, *4* (8), 8158-8174.
24. Paudel, D. R.; Pan, U. N.; Ghising, R. B.; Dhakal, P. P.; Dinh, V. A.; Wang, H.; Kim, N. H.; Lee, J. H., Interface modulation induced by the 1T Co-WS<sub>2</sub> shell nanosheet layer at the metallic NiTe<sub>2</sub>/Ni core–nanoskeleton: Glib electrode-kinetics for HER, OER, and ORR. *Nano Energy* **2022**, *102*, 107712.
